# Supplementary material
Source: PubMed Central journal article supplement (PMC2840085)
Supplement: 0911581107_pnas.200911581SI.pdf [file 0911581107_pnas.200911581SI.pdf]

# Supporting Information

Farrand et al. 10.1073/pnas.0911581107

## SI Text

**Circular Dichroism Spectroscopy.** Circular dichroism (CD) spectra were recorded using a J-715 Jasco CD spectropolarimeter. Wavelength scans were performed between 205 and 240 nm in PBS in 1-mm quartz cuvettes using 5.22  $\mu$ M protein. Five traces were collected for each protein. Data were analyzed using the CONTINLL, SELCON3, and CDSSTR algorithms from the CDPro software package and the SP43 reference protein database (1, 2).

**Tryptophan Emission.** Intrinsic fluorescence of the tryptophan residues in PFO and its derivatives was measured to assess the relative conformation of the D4 loops of PFO loop mutants compared to wild-type toxin. Protein samples (88.23  $\mu$ M) were incubated at room temperature in HBS for 5 min before measuring their tryptophan emission. Emission spectra were scanned between 310 and 400 nm with an excitation wavelength of 295 nm. The emission scans from a total of four separate experiments were averaged.

1. Kabsch W, Sander C (1983) Dictionary of protein secondary structure: Pattern recognition of hydrogen-bonded and geometrical features. *Biopolymers* 22:2577–2637.

2. Sreerama N, Woody RW (1994) Poly(pro)II helices in globular proteins: Identification and circular dichroic analysis. *Biochemistry* 33:10022–10025.

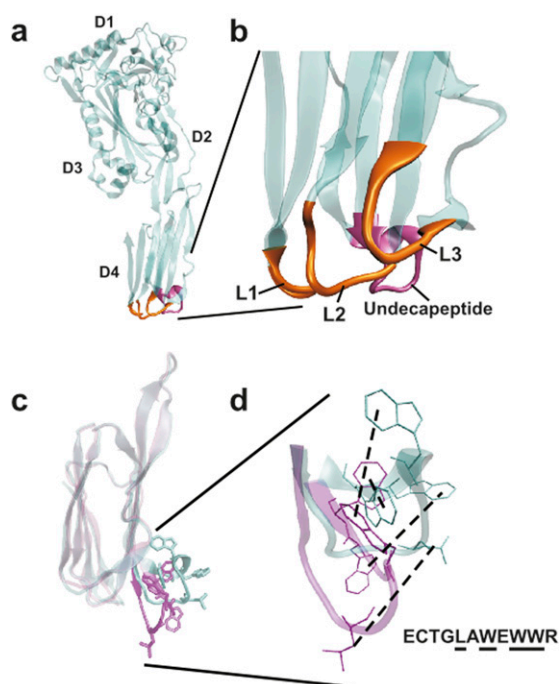

**Fig. S1.** The molecular structures of domain 4 and the undecapeptide from PFO and ALO. Shown is a ribbon representation of the crystal structure of PFO (1) (A), PFO domain 4 showing the locations of loops L1–L3 (orange), and the undecapeptide (purple) (B), and overlays of the domain 4 (C) and undecapeptide (D) structures of PFO (cyan) and ALO (2) (purple). Shown in D are the relative positions of the leucine and three tryptophans of the conserved undecapeptide (ECTGLAWEWWR) from PFO and ALO. The dashed lines connect the equivalent undecapeptide leucine and tryptophan residues of PFO and ALO. D1–D4, domains 1–4 of PFO.

1. Rossjohn J, Feil SC, McKinstry WJ, Tweten RK, Parker MW (1997) Structure of a cholesterol-binding thiol-activated cytolysin and a model of its membrane form. *Cell* 89:685–692.

2. Bourdeau RW, et al. (2009) Cellular functions and X-ray structure of anthrolysin O, a cholesterol-dependent cytolysin secreted by *Bacillus anthracis*. *J Biol Chem* 284:14645–14656.

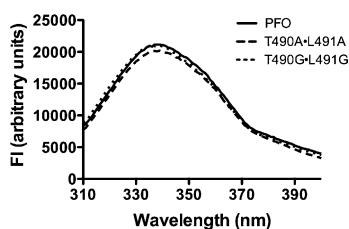

**Fig. S2.** Tryptophan emission of PFO, PFO<sup>T490A•L490A</sup>, and PFO<sup>T490G•L491G</sup>. The tryptophan emission of PFO, PFO<sup>T490A•L491A</sup>, and PFO<sup>T490G•L491G</sup> were determined. Protein samples (88.23  $\mu$ M) were incubated at room temperature in HBS for 5 min. Tryptophan emission measurements were taken between 310 and 400 nm with an excitation wavelength of 295 nm. Four separate experiments were performed and the data averaged.



**Table S1. CDC loop L1–L3 residues**

| CDC             | Loop 1 | Loop 2  | Loop 3 |
|-----------------|--------|---------|--------|
| Anthrolysin     | GTTLYP | HYGAYVA | DKTAH  |
| Cereolysin      | GTTLYP | HYGAYVA | DKTAH  |
| Thuringiolysin  | GTTLYP | HYGAYVA | DKTAH  |
| Sphaericolysin  | GTTLYP | HYGAYVA | DKTAH  |
| Alveolysin      | GTTLYP | HSGAYVA | DRSAH  |
| Perfringolysin  | GTTLYP | HSGAYVA | DKTAH  |
| Caniolysin      | GSTLSP | HQGAYVA | SKTSP  |
| Equisimilysin   | GSTLSP | HQGAYVA | SKTSP  |
| Streptolysin    | GSTLSP | HQGAYVA | SKTSP  |
| Botulinolysin   | GTTLYP | HSGAYVA | DKTAH  |
| Tetanolysin     | GTTLYP | HSGAYVA | DRTAH  |
| Novyiolysin     | GTTLYP | HRGAYVA | GRTAH  |
| Ivanolysin      | GTTLYP | HSGAYVA | DKLAH  |
| Listeriolysin   | GTTLYP | HSGGYVA | SKLAH  |
| Seeligeriolysin | GTTLYP | HSGGYVA | SKLAH  |
| Vaginolysin     | GTTLWP | HRGAYVA | YRTAH  |
| Lectinolysin    | GTTLNP | HKGAYVA | NRTSG  |
| Intermedilysin  | GTTLHP | HDGAFVA | NRGAH  |
| Suilysin        | GTTLYP | HSGAYVA | NLTSH  |
| Pneumolysin     | GTTLYP | HSGAYVA | DLTAH  |
| Pyolysin        | GTTLNP | HGGGYVA | ARTLG  |

Shown are the residues that comprise loops L1–L3 in the CDCs and those conserved in all CDCs (gray background). Alignments of the loops were derived from the alignment of the full-length CDC primary structures using CLC Sequence Viewer.

**Table S2. Circular dichroism analysis of the secondary structure of PFO and its derivatives**

| Toxin       | Circular dichroism (SE)           |                                   |                                   |                                   |
|-------------|-----------------------------------|-----------------------------------|-----------------------------------|-----------------------------------|
|             | $\alpha$ -Helix                   | $\beta$ -Sheet                    | Turn                              | Unordered                         |
| PFO         | 21 $\pm$ 2.3                      | 34 $\pm$ 1.3                      | 21 $\pm$ 0.1                      | 25 $\pm$ 1.1                      |
| T490A•L491A | 20 $\pm$ 2.3 ( <i>P</i> = 0.7650) | 33 $\pm$ 2.4 ( <i>P</i> = 0.7342) | 21 $\pm$ 0.2 ( <i>P</i> = 0.2720) | 26 $\pm$ 1.4 ( <i>P</i> = 0.7508) |
| T490G•L491G | 20 $\pm$ 3.3 ( <i>P</i> = 0.6320) | 35 $\pm$ 1.3 ( <i>P</i> = 0.4599) | 21 $\pm$ 0.3 ( <i>P</i> = 0.0789) | 26 $\pm$ 1.3 ( <i>P</i> = 0.7052) |
| T490L•L491T | 22 $\pm$ 4.2 ( <i>P</i> = 0.6950) | 29 $\pm$ 4.9 ( <i>P</i> = 0.3767) | 21 $\pm$ 0.4 ( <i>P</i> = 0.1710) | 27 $\pm$ 1.7 ( <i>P</i> = 0.4751) |

Shown are the results of CD analysis of the secondary structure of PFO and the mutants of the cholesterol binding motif. In parenthesis are the *P* values for a paired *t* test comparing PFO with each mutant (*n* = 5). No significant differences in the secondary structure were observed.
